# Supplementary material for: Risk Due to ABO Incompatibility and Donor-Recipient Weight Mismatch in Living Donor Kidney Transplantation: A National Cohort Study
Source: MDPI journal article supplement (doi:10.3390/jcm10235674), 2021-12-01
Supplement: s1 [file s1]

Figure S1. Distribution of donor-recipient weight ratio

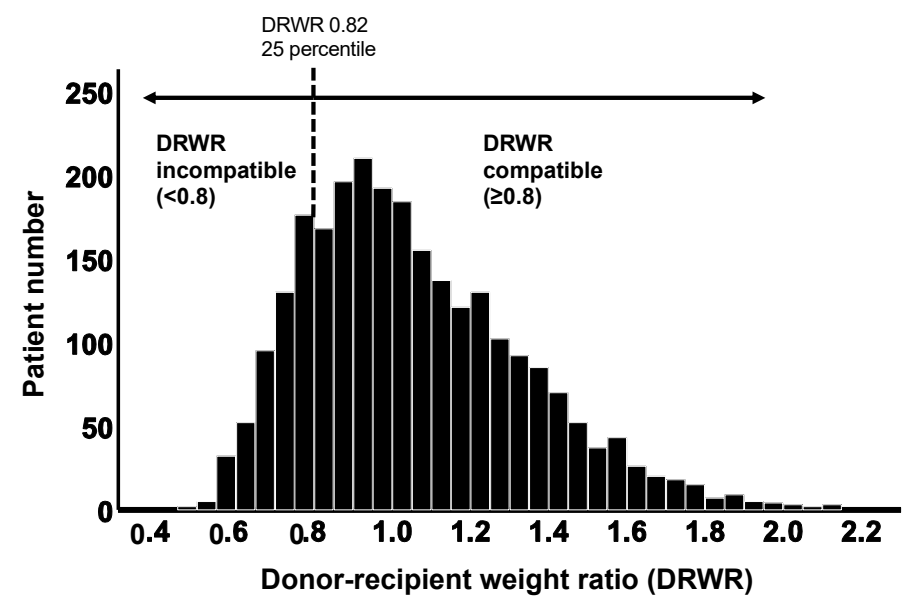

DRWR, dono-recipient weight ratio

**Table S1. Details of ABOi LDKT (for available data only)**

| Variables                      | Available data | ABOi LDKT (n= 643) |
|--------------------------------|----------------|--------------------|
| Recipient blood type O         | n=643          | 267 (41.5)         |
| ABO titer, baseline            |                |                    |
| IgM                            | n=249          | 32 (IQR 8-64)      |
| IgG                            | n=175          | 32 (IQR 8-128)     |
| High titer ( $\geq 256$ )      |                |                    |
| ABO titer, at transplantation  |                |                    |
| IgM                            | n=160          | 2 (IQR 1-4)        |
| IgG                            | n=120          | 8 (IQR 2-16)       |
| Rituximab use                  | n=306          | 290 (94.8)         |
| Number of plasmapheresis       | n=306          | 3.4 $\pm$ 2.6      |
| Intravenous immunoglobulin use | n=306          | 98 (32.0)          |

LDKT, living donor kidney transplantation

**Table S2. Full results of one-way ANOVA with post hoc analyses for comparison eGFR at each time point**

| <b>eGFR at discharge</b>         |            | <b>P value</b> |
|----------------------------------|------------|----------------|
| ABOc-DRWRc (n=1570)<br>75.4±21.9 | ABOc-DRWRi | <0.001         |
|                                  | ABOi-DRWRc | 0.999          |
|                                  | ABOi-DRWRi | <0.001         |
| ABOc-DRWRi (n=371)<br>59.1±15.6  | ABOc-DRWRc | <0.001         |
|                                  | ABOi-DRWRc | <0.001         |
|                                  | ABOi-DRWRi | 0.999          |
| ABOi-DRWRc (n=519)<br>75.2±23.2  | ABOc-DRWRc | 0.999          |
|                                  | ABOc-DRWRi | <0.001         |
|                                  | ABOi-DRWRi | <0.001         |
| ABOi-DRWRi (n=124)<br>57.8±16.5  | ABOc-DRWRc | <0.001         |
|                                  | ABOc-DRWRi | 0.999          |
|                                  | ABOi-DRWRc | <0.001         |
| <b>eGFR at 6 months</b>          |            |                |
| ABOc-DRWRc (n=1542)<br>64.3±17.5 | ABOc-DRWRi | <0.001         |
|                                  | ABOi-DRWRc | 0.168          |
|                                  | ABOi-DRWRi | <0.001         |
| ABOc-DRWRi (n=360)<br>57.1±14.7  | ABOc-DRWRc | <0.001         |
|                                  | ABOi-DRWRc | <0.001         |
|                                  | ABOi-DRWRi | 0.547          |
| ABOi-DRWRc (n=513)<br>62.4±17.0  | ABOc-DRWRc | 0.168          |
|                                  | ABOc-DRWRi | <0.001         |
|                                  | ABOi-DRWRi | <0.001         |
| ABOi-DRWRi (n=119)<br>54.1±16.9  | ABOc-DRWRc | <0.001         |
|                                  | ABOc-DRWRi | 0.547          |
|                                  | ABOi-DRWRc | <0.001         |
| <b>eGFR at 1 year</b>            |            |                |
| ABOc-DRWRc (n=1435)<br>65.4±18.2 | ABOc-DRWRi | <0.001         |
|                                  | ABOi-DRWRc | 0.135          |
|                                  | ABOi-DRWRi | <0.001         |
| ABOc-DRWRi (n=333)<br>58.0±16.2  | ABOc-DRWRc | <0.001         |
|                                  | ABOi-DRWRc | <0.001         |
|                                  | ABOi-DRWRi | <0.546         |
| ABOi-DRWRc (n=471)<br>63.2±18.7  | ABOc-DRWRc | 0.135          |
|                                  | ABOc-DRWRi | <0.001         |
|                                  | ABOi-DRWRi | <0.001         |
| ABOi-DRWRi (n=111)<br>54.6±18.3  | ABOc-DRWRc | <0.001         |
|                                  | ABOc-DRWRi | 0.546          |
|                                  | ABOi-DRWRc | <0.001         |
| <b>eGFR at 2 year</b>            |            |                |
| ABOc-DRWRc (n=1017)<br>65.0±19.6 | ABOc-DRWRi | <0.001         |
|                                  | ABOi-DRWRc | 0.444          |

|                                 |            |        |
|---------------------------------|------------|--------|
|                                 | ABOi-DRWRi | <0.001 |
| ABOc-DRWRi (n=237)<br>57.8±18.4 | ABOc-DRWRc | <0.001 |
|                                 | ABOi-DRWRc | 0.017  |
|                                 | ABOi-DRWRi | 0.999  |
| ABOi-DRWRc (n=325)<br>62.8±19.6 | ABOc-DRWRc | 0.444  |
|                                 | ABOc-DRWRi | 0.017  |
|                                 | ABOi-DRWRi | 0.003  |
| ABOi-DRWRi (n=81)<br>54.4±20.8  | ABOc-DRWRc | <0.001 |
|                                 | ABOc-DRWRi | 0.999  |
|                                 | ABOi-DRWRc | 0.003  |

DRWR, donor-recipient weight ratio

Post hoc analyses were performed with Bonferroni method.

Figure S2. Causes of graft failure in each group

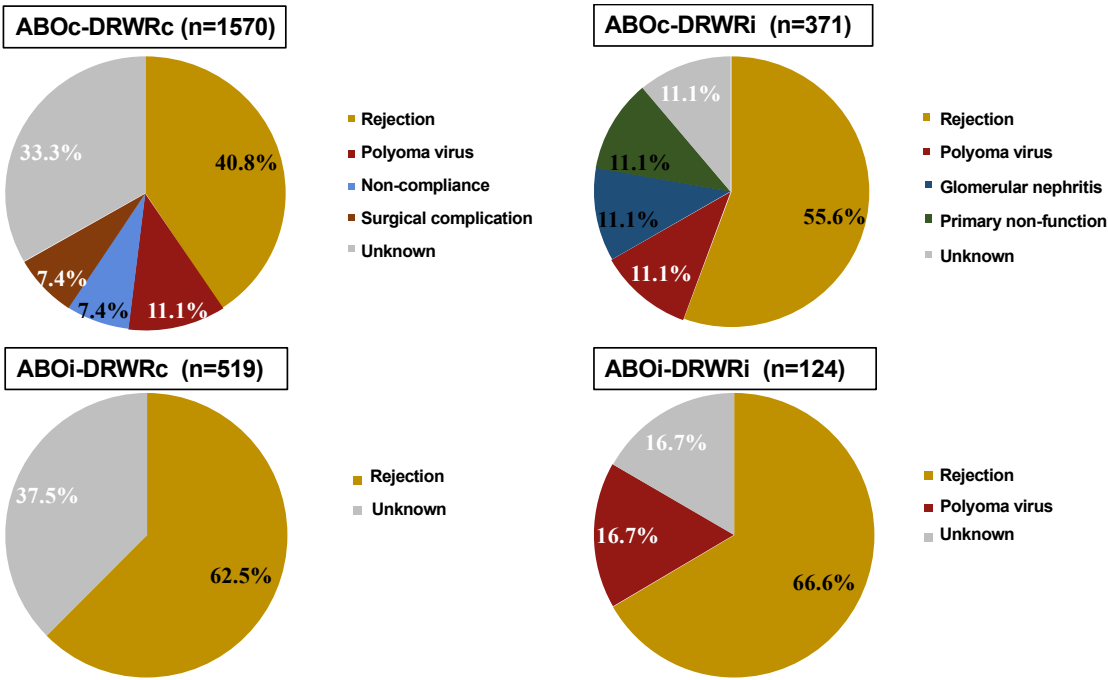

**Table S3. Cox regression analysis for death-censored graft survival**

| Variables                             | Cox regression with competing risk analysis |         |                  |         |
|---------------------------------------|---------------------------------------------|---------|------------------|---------|
|                                       | Univariate                                  |         | Multivariate     |         |
|                                       | HR (95% CI)                                 | p-value | HR (95% CI)      | p-value |
| Age, per 1 year                       | 0.98 (0.96-1.01)                            | 0.079   | 0.97 (0.95-0.99) | 0.026   |
| Sex, male                             | 1.37 (0.76-2.49)                            | 0.294   |                  |         |
| BMI per 1 kg/m <sup>2</sup>           | 1.06 (0.98-1.13)                            | 0.141   |                  |         |
| Dialysis duration, month              | 1.00 (0.99-1.01)                            | 0.361   |                  |         |
| Retransplantation                     | 0.32 (0.04-2.33)                            | 0.261   |                  |         |
| Diabetes mellitus                     | 1.54 (0.87-2.70)                            | 0.137   |                  |         |
| Hypertension                          | 0.58 (0.27-1.24)                            | 0.162   |                  |         |
| Cardiovascular disease                | 0.66 (0.21-2.12)                            | 0.484   |                  |         |
| Donor age                             | 1.02 (1.00-1.05)                            | 0.072   | 1.02 (0.99-1.05) | 0.109   |
| Donor sex, male                       | 0.61 (0.34-1.11)                            | 0.103   |                  |         |
| Donor BMI                             | 0.99 (0.90-1.08)                            | 0.787   |                  |         |
| Unrelated donor                       | 1.33 (0.76-2.31)                            | 0.318   |                  |         |
| Number of HLA mismatches (for A/B/DR) | 1.25 (1.02-1.52)                            | 0.028   | 1.29 (1.04-1.60) | 0.021   |
| XM-DSA+                               | 1.07 (0.33-3.45)                            | 0.906   |                  |         |
| Induction agent                       |                                             |         |                  |         |
| IL-2 receptor antibody                | Reference                                   |         |                  |         |
| Anti-thymocyte globulin               | 1.15 (0.49-2.70)                            | 0.750   |                  |         |
| Group                                 |                                             |         |                  |         |
| ABOc DRWRc                            | Reference                                   |         | Reference        |         |
| ABOc DRWRi                            | 1.46 (0.69-3.10)                            | 0.327   | 1.32 (0.62-2.83) | 0.469   |
| ABOi DRWRc                            | 0.90 (0.41-1.98)                            | 0.791   | 0.82 (0.37-1.81) | 0.624   |
| ABOi DRWRi                            | 2.94 (1.21-7.12)                            | 0.017   | 2.73 (1.11-6.70) | 0.028   |
| ABOi vs. ABOc                         | 1.18 (0.64-2.19)                            | 0.601   | 1.10 (0.59-2.04) | 0.770   |
| DRWRi vs. DRWRc                       | 1.87 (1.02-3.43)                            | 0.042   | 1.75 (0.95-3.23) | 0.074   |

BMI, body mass index; DRWR, donor-recipient weight ratio; DSA, donor specific antibody;

HLA, human leukocyte antigen; IL, interleukin; XM, crossmatch

Figure S3. Causes of death in each group

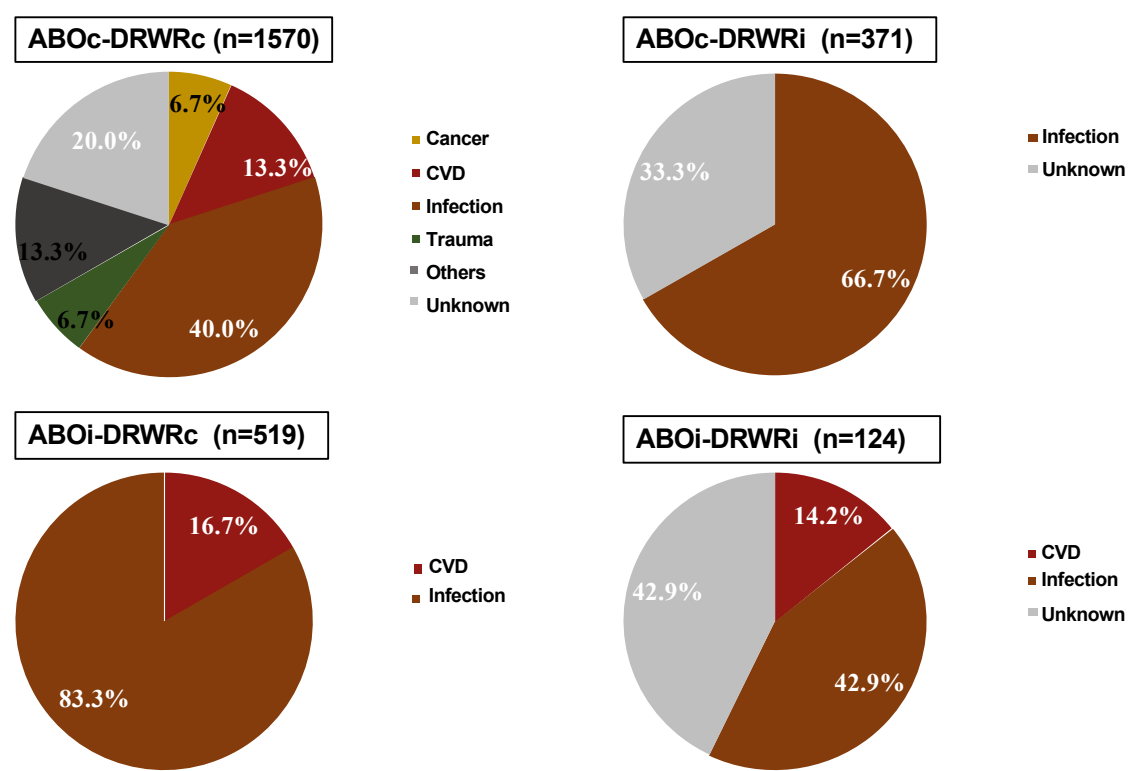

CVD, cardiovascular disease

**Table S4. Cox regression analysis for patient survival**

| Variables                             | Cox regression with competing risk analysis |         |                  |         |
|---------------------------------------|---------------------------------------------|---------|------------------|---------|
|                                       | Univariate                                  |         | Multivariate     |         |
|                                       | HR (95% CI)                                 | p-value | HR (95% CI)      | p-value |
| Age                                   | 1.05 (1.01-1.08)                            | 0.008   |                  |         |
| Sex, male                             | 2.19 (0.95-5.09)                            | 0.067   |                  |         |
| BMI                                   | 1.07 (0.98-1.17)                            | 0.159   |                  |         |
| Dialysis duration                     | 1.01 (1.00-1.01)                            | 0.093   |                  |         |
| Retransplantation                     | 1.09 (0.26-4.57)                            | 0.907   |                  |         |
| Diabetes mellitus                     | 1.88 (0.93-3.81)                            | 0.081   |                  |         |
| Hypertension                          | 3.36 (0.46-24.61)                           | 0.234   |                  |         |
| Cardiovascular disease                | 3.55 (1.59-7.95)                            | 0.002   | 3.06 (1.35-6.91) | 0.007   |
| Donor age                             | 1.01 (0.98-1.05)                            | 0.418   |                  |         |
| Donor sex, male                       | 0.92 (0.45-1.87)                            | 0.817   |                  |         |
| Donor BMI                             | 0.97 (0.86-1.08)                            | 0.564   |                  |         |
| Unrelated donor                       | 4.16 (1.79-9.67)                            | 0.001   | 3.32 (1.39-7.97) | 0.007   |
| Number of HLA mismatches (for A/B/DR) | 1.55 (1.18-2.03)                            | 0.002   |                  |         |
| XM-DSA+                               | 3.24 (1.24-8.44)                            | 0.016   | 1.43 (1.04-1.98) | 0.029   |
| Induction agent                       |                                             |         |                  |         |
| IL-2 receptor antibody                | Reference                                   |         |                  |         |
| Anti-thymocyte globulin               | 2.01 (0.82-4.90)                            | 0.125   |                  |         |
| Group                                 |                                             |         |                  |         |
| ABOc DRWRc                            | Reference                                   |         | Reference        |         |
| ABOc DRWRi                            | 0.86 (0.25-2.97)                            | 0.813   | 0.67 (0.19-2.35) | 0.533   |
| ABOi DRWRc                            | 1.21 (0.47-3.12)                            | 0.693   | 0.93 (0.35-2.42) | 0.875   |
| ABOi DRWRi                            | 6.02 (2.46-14.77)                           | <0.001  | 3.55 (1.39-9.04) | 0.008   |
| ABOi vs. ABOc                         | 2.18 (1.07-4.45)                            | 0.032   | 1.65 (0.79-3.42) | 0.181   |
| DRWRi vs. DRWRc                       | 2.05 (0.96-4.34)                            | 0.063   | 1.64 (0.75-3.59) | 0.214   |

Multivariable Cox model for patient survival was established by stepwise regression for establishing optimal model with limited number of death event (n=30). CVD, unrelated donor and XM-DSA+ were finally included in the model.

BMI, body mass index; DRWR, donor-recipient weight ratio; DSA, donor specific antibody;

HLA, human leukocyte antigen; IL, interleukin; XM, crossmatch

;



**Table S5. Cox regression analysis for BPAR**

| Variables                             | Cox regression with competing risk analysis |         |                  |         |
|---------------------------------------|---------------------------------------------|---------|------------------|---------|
|                                       | Univariate                                  |         | Multivariate     |         |
|                                       | HR (95% CI)                                 | p-value | HR (95% CI)      | p-value |
| Age                                   | 0.99 (0.98-0.99)                            | 0.001   | 0.98 (0.97-0.99) | <0.001  |
| Sex, male                             | 1.47 (1.22-1.77)                            | <0.001  | 1.59 (1.29-1.96) | <0.001  |
| BMI                                   | 0.99 (0.98-1.02)                            | 0.819   |                  |         |
| Dialysis duration                     | 0.99 (0.99-1.01)                            | 0.179   |                  |         |
| Retransplantation                     | 0.53 (0.33-0.85)                            | 0.008   | 0.56 (0.65-0.90) | 0.016   |
| Diabetes mellitus                     | 0.91 (0.76-1.10)                            | 0.336   |                  |         |
| Hypertension                          | 0.90 (0.69-1.18)                            | 0.439   |                  |         |
| Cardiovascular disease                | 0.72 (0.52-1.01)                            | 0.055   | 0.73 (0.52-1.03) | 0.073   |
| Donor age                             | 1.02 (1.01-1.03)                            | <0.001  | 1.02 (1.01-1.03) | <0.001  |
| Donor sex, male                       | 0.78 (0.65-0.93)                            | 0.005   | 0.99 (0.82-1.21) | 0.971   |
| Donor BMI                             | 1.01 (1.00-1.01)                            | 0.083   | 1.01 (0.99-1.04) | 0.083   |
| Unrelated donor                       | 1.37 (1.16-1.63)                            | <0.001  | 1.12 (0.89-1.40) | 0.349   |
| Number of HLA mismatches (for A/B/DR) | 1.16 (1.09-1.23)                            | <0.001  | 1.14 (1.06-1.23) | 0.001   |
| XM-DSA+                               | 1.15 (1.03-1.27)                            | 0.010   | 1.21 (1.09-1.35) | <0.001  |
| Induction agent                       |                                             |         |                  |         |
| IL-2 receptor antibody                | Reference                                   |         |                  |         |
| Anti-thymocyte globulin               | 1.44 (1.13-1.83)                            | 0.003   | 1.29 (0.97-1.68) | 0.063   |
| Group                                 |                                             |         |                  |         |
| ABOc DRWRc                            | Reference                                   |         |                  |         |
| ABOc DRWRi                            | 1.29 (1.02-1.64)                            | 0.037   | 1.02 (0.79-1.32) | 0.879   |
| ABOi DRWRc                            | 1.23 (0.99-1.52)                            | 0.060   | 1.11 (0.89-1.38) | 0.355   |
| ABOi DRWRi                            | 1.66 (1.17-2.34)                            | 0.004   | 1.27 (0.88-1.82) | 0.203   |
| ABOi vs. ABOc                         | 1.24 (1.03-1.50)                            | 0.024   | 1.14 (0.94-1.38) | 0.190   |
| DRWRi vs. DRWRc                       | 1.31 (1.07-1.60)                            | 0.009   | 1.05 (0.84-1.31) | 0.661   |

BMI, body mass index; DRWR, donor-recipient weight ratio; DSA, donor specific antibody;

HLA, human leukocyte antigen; IL, interleukin; XM, crossmatch

**Table S6. Cox regression analysis for pneumonia**

| Variables                             | Cox regression with competing risk analysis |         |                  |         |
|---------------------------------------|---------------------------------------------|---------|------------------|---------|
|                                       | Univariate                                  |         | Multivariate     |         |
|                                       | HR (95% CI)                                 | p-value | HR (95% CI)      | p-value |
| Age                                   | 1.03 (1.01-1.04)                            | 0.001   | 1.02 (1.01-1.04) | 0.006   |
| Sex, male                             | 1.63 (1.12-2.38)                            | 0.010   | 1.43 (0.96-2.14) | 0.080   |
| BMI                                   | 0.99 (0.95-1.03)                            | 0.546   |                  |         |
| Dialysis duration                     | 1.00 (0.99-1.01)                            | 0.706   |                  |         |
| Retransplantation                     | 0.88 (0.41-1.87)                            | 0.732   |                  |         |
| Diabetes mellitus                     | 0.99 (0.69-1.44)                            | 0.979   |                  |         |
| Hypertension                          | 1.25 (0.67-2.32)                            | 0.479   |                  |         |
| Cardiovascular disease                | 1.69 (1.04-2.75)                            | 0.034   | 1.29 (0.78-2.13) | 0.330   |
| Donor age                             | 1.02 (1.01-1.04)                            | 0.003   | 1.02 (1.01-1.04) | 0.006   |
| Donor sex, male                       | 0.83 (0.59-1.18)                            | 0.304   |                  |         |
| Donor BMI                             | 0.98 (0.92-1.03)                            | 0.386   |                  |         |
| Unrelated donor                       | 1.50 (1.07-2.11)                            | 0.020   | 0.90 (0.61-1.33) | 0.604   |
| Number of HLA mismatches (for A/B/DR) | 1.07 (0.95-1.20)                            | 0.282   |                  |         |
| XM-DSA+                               | 0.97 (0.75-1.25)                            | 0.804   |                  |         |
| Induction agent                       |                                             |         |                  |         |
| IL-2 receptor antibody                | Reference                                   |         |                  |         |
| Anti-thymocyte globulin               | 0.99 (0.57-1.72)                            | 0.964   |                  |         |
| Group                                 |                                             |         |                  |         |
| ABOc DRWRc                            | Reference                                   |         |                  |         |
| ABOc DRWRi                            | 1.34 (0.80-2.25)                            | 0.262   | 1.15 (0.67-1.97) | 0.605   |
| ABOi DRWRc                            | 1.91 (1.27-2.86)                            | 0.002   | 1.87 (1.24-2.82) | 0.003   |
| ABOi DRWRi                            | 3.53 (2.04-6.12)                            | <0.001  | 2.94 (1.64-5.57) | <0.001  |
| ABOi vs. ABOc                         | 2.08 (1.47-2.93)                            | <0.001  | 2.02 (1.42-2.87) | <0.001  |
| DRWRi vs. DRWRc                       | 1.53 (1.04-2.25)                            | 0.030   | 1.28 (0.85-1.94) | 0.235   |

BMI, body mass index; DRWR, donor-recipient weight ratio; DSA, donor specific antibody;

HLA, human leukocyte antigen; IL, interleukin; XM, crossmatch
